# Supplementary material for: Economic and Welfare Impacts of Providing Good Life Opportunities to Farm Animals
Source: PubMed Central journal article supplement (PMC7222722; doi:10.3390/ani10040610), 2020-04-02
Supplement: animals-10-00610-s001.pdf [file animals-10-00610-s001.pdf]

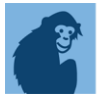

# Economic and Welfare Impacts of Providing Good Life Opportunities to Farm Animals <sup>†</sup>

Jessica E. Stokes <sup>1,2,\*</sup>, Siobhan Mullan <sup>1</sup>, Taro Takahashi <sup>1,3</sup>, Federica Monte <sup>4</sup> and David CJ Main <sup>2</sup>

<sup>1</sup> Bristol Vet School, University of Bristol, Langford House, Langford, Somerset BS40 5DU, UK;

Siobhan.Mullan@Bristol.ac.uk (S.M.); taro.takahashi@bristol.ac.uk (T.T.)

<sup>2</sup> School of Agriculture, Food and the Environment, Royal Agricultural University, Cirencester, Gloucestershire GL7 6JS, UK; David.Main@rau.ac.uk

<sup>3</sup> Sustainable Agriculture Sciences Department, Rothamsted Research, North Wyke, Okehampton, Devon EX20 2SB, UK

<sup>4</sup> Agriculture and Land Management, ADAS, Portview Road, Avonmouth, Bristol, BS11 9JE, UK; Fede.monte@adas.co.uk

\* Correspondence: jessica.stokes@rau.ac.uk

## Supplementary Material

**Table S1** Sample characteristics

**Table S2** Costs considered in economic analysis

**Table S3** Total cost to satisfy each resource tier

**Table S4** Incremental cost to satisfy higher resource tiers

**Table S5** Correlation coefficients amongst resource tier scores and estimated cost

**Table S6** *p*-values for correlations amongst resource tier scores and estimated cost

**Table S7** *p*-values for correlations between resource tier scores and welfare outcome measures

**Table S1.** Sample characteristics (*N* = 49).

| Variable                              | Mean (range)             |    |
|---------------------------------------|--------------------------|----|
| Flock size (birds)                    | 8,015 (110 – 16,000)     |    |
| Flock age (week)                      | 42 (18 – 132)            |    |
| Breed                                 | Lohmann Brown            | 26 |
|                                       | Hy-Line                  | 5  |
|                                       | British Blacktail        | 7  |
|                                       | Warren                   | 3  |
|                                       | Shaver brown             | 2  |
|                                       | Novogen breeds           | 3  |
|                                       | Other traditional breeds | 3  |
| Participation in certification scheme | RSPCA Freedom Food       | 39 |
|                                       | Soil Association         | 10 |

**Table S2.** Costs considered in economic analysis

| Resource need        | Welfare +                                                                                                                                                                  | Welfare ++ <sup>1</sup>                                                                                                                                                            | Welfare +++ <sup>1</sup>                                                                                                                                              |
|----------------------|----------------------------------------------------------------------------------------------------------------------------------------------------------------------------|------------------------------------------------------------------------------------------------------------------------------------------------------------------------------------|-----------------------------------------------------------------------------------------------------------------------------------------------------------------------|
| Physical environment | <ul style="list-style-type: none"> <li>• Two types of litter substrates</li> <li>• Two types of perches</li> <li>• Labour cost for installation and maintenance</li> </ul> | <ul style="list-style-type: none"> <li>• Two types of perches for pellets</li> <li>• Multiple flooring types during rearing</li> </ul>                                             | <ul style="list-style-type: none"> <li>• Substrate flooring</li> </ul>                                                                                                |
| Thermal environment  |                                                                                                                                                                            | <ul style="list-style-type: none"> <li>• Windbreaks</li> <li>• Artificial shelters</li> </ul>                                                                                      | <ul style="list-style-type: none"> <li>• Pop hole covers</li> </ul>                                                                                                   |
| Minimising harms     |                                                                                                                                                                            | <ul style="list-style-type: none"> <li>• Ramps between pop holes, litter, slats, house and nest boxes</li> </ul>                                                                   | <ul style="list-style-type: none"> <li>• Labour cost for extra monitoring of keel bone damages</li> </ul>                                                             |
| Cognitive enrichment | <ul style="list-style-type: none"> <li>• Log piles, fallen branches and fallen trees</li> <li>• Labour cost for weekly replacement of enrichments</li> </ul>               | <ul style="list-style-type: none"> <li>• Additional log piles, fallen branches and fallen trees</li> <li>• Labour cost for weekly replacement of additional enrichments</li> </ul> | <ul style="list-style-type: none"> <li>• Puzzle feeders</li> </ul>                                                                                                    |
| Food choices         | <ul style="list-style-type: none"> <li>• Wholegrain oats provided separately from other feeds</li> <li>• Insoluble grit provided separately from other feeds</li> </ul>    | <ul style="list-style-type: none"> <li>• Feeders and drinkers on every level</li> <li>• Pecking blocks</li> <li>• Labour cost for scattering grain on litter</li> </ul>            | <ul style="list-style-type: none"> <li>• Different feeders and drinkers on every level</li> <li>• Chicory and clovers provided separately from other feeds</li> </ul> |
| Positive experiences |                                                                                                                                                                            | <ul style="list-style-type: none"> <li>• Labour cost for extra monitoring of flock experiences</li> </ul>                                                                          | <ul style="list-style-type: none"> <li>• Labour cost for regular handling of birds</li> <li>• Labour cost for handfeeding pullets</li> </ul>                          |
| Nesting choices      | <ul style="list-style-type: none"> <li>• Extra nest boxes</li> </ul>                                                                                                       | <ul style="list-style-type: none"> <li>• Enhanced substrates for nest boxes with wood shavings, buckwheat and oat husks</li> </ul>                                                 | <ul style="list-style-type: none"> <li>• Individual nest boxes</li> </ul>                                                                                             |
| Social experiences   | <ul style="list-style-type: none"> <li>• Labour cost for managing pariah birds</li> </ul>                                                                                  | <ul style="list-style-type: none"> <li>• Visual barriers to create smaller groups</li> </ul>                                                                                       | <ul style="list-style-type: none"> <li>• Inclusion of cockerels</li> <li>• Capital and labour costs for reducing stocking density</li> </ul>                          |

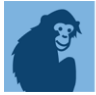

|                              |                                                                                                                                                                                                                                      |                                                                                                                                                                                   |                                                                                                         |
|------------------------------|--------------------------------------------------------------------------------------------------------------------------------------------------------------------------------------------------------------------------------------|-----------------------------------------------------------------------------------------------------------------------------------------------------------------------------------|---------------------------------------------------------------------------------------------------------|
| Enriched environment         | <ul style="list-style-type: none"> <li>• Alfalfa blocks, straw nets and pecking blocks</li> <li>• Labour cost for placing and managing enrichments</li> </ul>                                                                        | <ul style="list-style-type: none"> <li>• Alfalfa blocks, straw nets, pecking blocks for pellets</li> <li>• Labour cost for placing and managing additional enrichments</li> </ul> | <ul style="list-style-type: none"> <li>• Projector and screen</li> </ul>                                |
| Positive outdoor environment | <ul style="list-style-type: none"> <li>• Trees and hedges to cover 5% of the range</li> <li>• Artificial shelters immediately outside pop holes</li> <li>• Roofed sandpits</li> <li>• Animals (alpacas) kept on the range</li> </ul> |                                                                                                                                                                                   | <ul style="list-style-type: none"> <li>• Establishment of an orchard to cover half the range</li> </ul> |
| Dustbathing                  | <ul style="list-style-type: none"> <li>• Enhanced litter with woodchip and sand</li> <li>• Covered verandas</li> <li>• Extra drinkers</li> </ul>                                                                                     |                                                                                                                                                                                   | <ul style="list-style-type: none"> <li>• Deeper litter (15 cm)</li> </ul>                               |
| Effective management         | <ul style="list-style-type: none"> <li>• Labour cost for weekly health and welfare outcome assessments</li> </ul>                                                                                                                    | <ul style="list-style-type: none"> <li>• Frequent health and welfare reviews with the vet (at each laying cycle)</li> </ul>                                                       | <ul style="list-style-type: none"> <li>• Participation in welfare initiatives</li> </ul>                |
| Genetic selection            |                                                                                                                                                                                                                                      | <ul style="list-style-type: none"> <li>• Reduced production as a result of welfare-focused selection</li> </ul>                                                                   | <ul style="list-style-type: none"> <li>• Increased pullet cost for 'high maintenance' breeds</li> </ul> |

<sup>1</sup> In addition to all items considered for lower tiers



**Table S3.** Total cost to satisfy each resource tier (GBP)

| Resource need                | +    | ++   | +++  |
|------------------------------|------|------|------|
| Physical environment         | 0.27 | 0.98 | 1.12 |
| Thermal environment          | 0.00 | 0.08 | 0.14 |
| Minimising harms             | 0.00 | 0.08 | 0.09 |
| Cognitive enrichment         | 0.30 | 0.60 | 0.62 |
| Food choices                 | 0.18 | 0.28 | 0.31 |
| Positive experiences         | 0.00 | 0.07 | 0.23 |
| Nesting choices              | 0.24 | 0.33 | 0.71 |
| Social experiences           | 0.02 | 0.47 | 5.97 |
| Enriched environment         | 0.68 | 0.91 | 0.95 |
| Positive outdoor environment | 0.77 | 0.77 | 0.98 |
| Dustbathing                  | 1.85 | 1.85 | 2.11 |
| Effective management         | 0.07 | 0.28 | 0.34 |
| Genetic selection            | 0.00 | 0.45 | 2.13 |

Values are foregone net margins per dozen eggs (~0.7 kg) compared to a production system with no welfare enhancement.

**Table S4.** Incremental cost to satisfy higher resource tiers (GBP)

| Resource need                | +    | ++   | +++  |
|------------------------------|------|------|------|
| Physical environment         | 0.27 | 0.71 | 0.13 |
| Thermal environment          | 0.00 | 0.08 | 0.06 |
| Minimising harms             | 0.00 | 0.08 | 0.01 |
| Cognitive enrichment         | 0.30 | 0.30 | 0.02 |
| Food choices                 | 0.18 | 0.09 | 0.03 |
| Positive experiences         | 0.00 | 0.07 | 0.16 |
| Nesting choices              | 0.24 | 0.09 | 0.38 |
| Social experiences           | 0.02 | 0.45 | 5.50 |
| Enriched environment         | 0.68 | 0.23 | 0.04 |
| Positive outdoor environment | 0.77 | 0.00 | 0.21 |
| Dustbathing                  | 1.85 | 0.00 | 0.27 |
| Effective management         | 0.07 | 0.21 | 0.06 |
| Genetic selection            | 0.00 | 0.45 | 1.68 |

Values are foregone net margins per dozen eggs (~0.7 kg) compared to the resource tier one level below.



**Table S5.** Correlation coefficients amongst resource tier scores and estimated cost

| Opportunity    | COM   | PLE   | CON   | INT   | HEA   | TOT   | COS |
|----------------|-------|-------|-------|-------|-------|-------|-----|
| Comfort        | 1     |       |       |       |       |       |     |
| Pleasure       | 0.422 | 1     |       |       |       |       |     |
| Confidence     | 0.504 | 0.612 | 1     |       |       |       |     |
| Interest       | 0.628 | 0.536 | 0.383 | 1     |       |       |     |
| Healthy life   | 0.303 | 0.370 | 0.401 | 0.338 | 1     |       |     |
| Total score    | 0.741 | 0.739 | 0.787 | 0.719 | 0.724 | 1     |     |
| Estimated cost | 0.452 | 0.664 | 0.791 | 0.521 | 0.596 | 0.822 | 1   |

COM: Comfort. PLE: Pleasure. CON: Confidence. INT: Interest. HEA: Healthy life. TOT: Total score. COS: Estimated cost. All values are  $p < 0.05$ ; actual  $p$ -values are listed in Supplementary Table S6.

**Table S6.**  $p$ -values for correlations amongst resource tier scores and estimated cost

| Opportunity    | COM    | PLE    | CON    | INT    | HEA    | TOT    | COS |
|----------------|--------|--------|--------|--------|--------|--------|-----|
| Comfort        | 0      |        |        |        |        |        |     |
| Pleasure       | 0.003  | 0      |        |        |        |        |     |
| Confidence     | <0.001 | <0.001 | 0      |        |        |        |     |
| Interest       | <0.001 | <0.001 | 0.007  | 0      |        |        |     |
| Healthy life   | 0.034  | 0.009  | 0.004  | 0.018  | 0      |        |     |
| Total score    | <0.001 | <0.001 | <0.001 | <0.001 | <0.001 | 0      |     |
| Estimated cost | 0.001  | <0.001 | <0.001 | <0.001 | <0.001 | <0.001 | 1   |

COM: Comfort. PLE: Pleasure. CON: Confidence. INT: Interest. HEA: Healthy life. TOT: Total score. COS: Estimated cost.

**Table S7.**  $p$ -values for correlations between resource tier scores and welfare outcome measures

| Opportunity    | FL1   | FL2   | TRM          | ANT   | FLT          | MRT   | LIT          | MDD          |
|----------------|-------|-------|--------------|-------|--------------|-------|--------------|--------------|
| Comfort        | 0.407 | 0.609 | 0.474        | 0.125 | <b>0.007</b> | 0.210 | <b>0.014</b> | <b>0.038</b> |
| Pleasure       | 0.948 | 0.958 | <b>0.003</b> | 0.935 | 0.358        | 0.393 | 0.575        | <b>0.046</b> |
| Confidence     | 0.893 | 0.561 | 0.121        | 0.146 | <b>0.046</b> | 0.645 | 0.118        | <b>0.019</b> |
| Interest       | 0.584 | 0.120 | 0.653        | 0.272 | 0.152        | 0.060 | <b>0.019</b> | 0.084        |
| Healthy life   | 0.223 | 0.937 | 0.235        | 0.877 | 0.131        | 0.143 | <b>0.042</b> | 0.184        |
| Total score    | 0.397 | 0.541 | 0.169        | 0.320 | <b>0.017</b> | 0.208 | <b>0.012</b> | <b>0.011</b> |
| Estimated cost | 0.617 | 0.677 | <b>0.012</b> | 0.277 | 0.115        | 0.622 | <b>0.024</b> | 0.084        |

FL1: Feather loss (head and neck). FL2: Feather loss (back and vent). TRM: Beak trimming. ANT: Antagonistic behaviour. FLT: Flightiness. MRT: Mortality. LIT: Litter score. MDD: Mood dimension score. Bold values indicate  $p < 0.05$ . Corresponding correlation coefficients are listed within the main article (Table 3).
